# Supplementary material for: Multifaceted classification and integration of time-varying complex signals using analog neuromorphic UV phototransistors
Source: Royal Society of Chemistry journal article supplement (doi:10.1039/d4tc03865g), 2024-01-01
Supplement: d4tc03865g1.pdf [file d4tc03865g1.pdf]

Supplementary Material

## **Multifaceted Classification and Integration of Time-Varying Complex Signals using Analog Neuromorphic UV Phototransistors**

Mohit Kumar,<sup>a,b,\*</sup> Suwan Lee,<sup>b</sup> Hyunmin Dang,<sup>b</sup> and Hyungtak Seo<sup>a,b,\*</sup>

<sup>a</sup>Department of Energy Systems Research, Ajou University, Suwon, 16499, Republic of Korea,

<sup>b</sup>Department of Materials Science and Engineering, Ajou University, Suwon, 16499, Republic of Korea,

Email: mohitiopb@ajou.ac.kr (M.K.), hseo@ajou.ac.kr (H.S.)

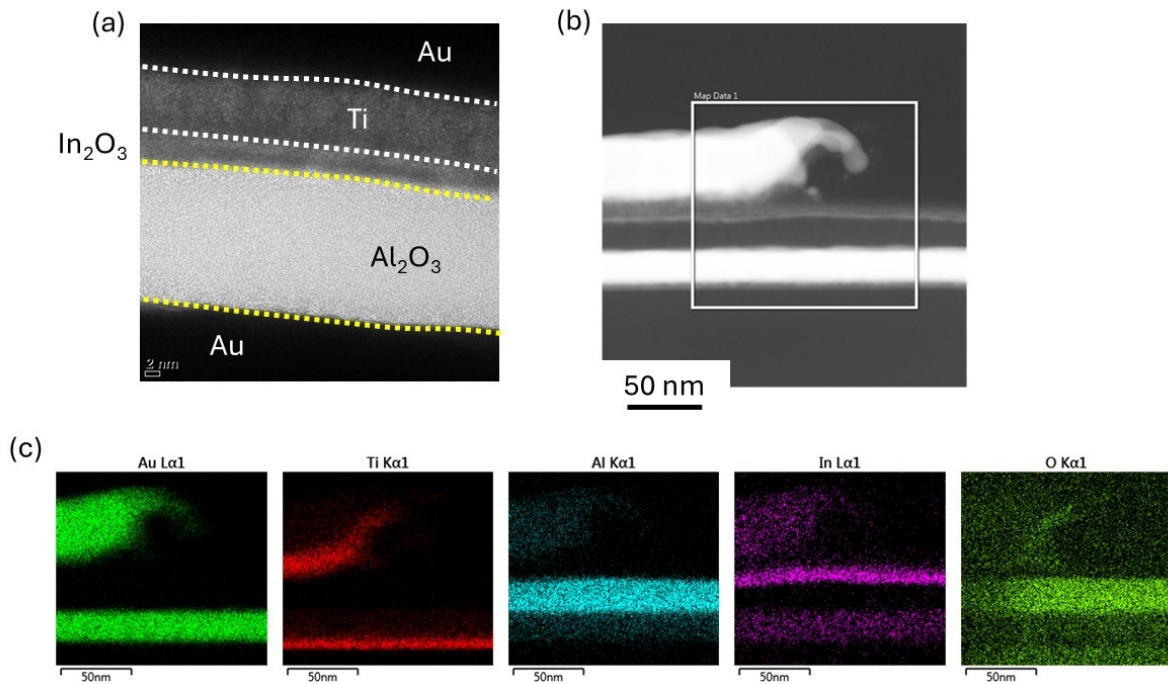

**Fig. S1.** Cross-sectional analysis of a multilayered structure composed of Au, Ti,  $\text{Al}_2\text{O}_3$ , and  $\text{In}_2\text{O}_3$  layers. (a) High-resolution transmission electron microscopy (HRTEM) image showing the distinct layers within the structure. The layers include gold (Au) at the top and bottom, titanium (Ti) and aluminum oxide ( $\text{Al}_2\text{O}_3$ ) in the middle, and indium oxide ( $\text{In}_2\text{O}_3$ ) at the uppermost layer. The boundaries between these layers are indicated by dotted lines: white dots for Au/Ti and Ti/ $\text{In}_2\text{O}_3$  interfaces, and yellow dots for the Au/ $\text{Al}_2\text{O}_3$  interface. The scale bar represents 2 nm. (b) TEM image providing a broader view of the multilayered structure. The highlighted square marks the area subjected to elemental mapping. The scale bar indicates 50 nm. (c) Energy-dispersive X-ray spectroscopy (EDS) elemental maps of the highlighted region in (b). These maps show the distribution of the following elements: Gold (Au, L $\alpha$ 1): Green signal showing the distribution of gold. Titanium (Ti, K $\alpha$ 1): Red signal indicating the distribution of titanium. Aluminum (Al, K $\alpha$ 1): Cyan signal representing the distribution of aluminum within the  $\text{Al}_2\text{O}_3$  layer. Indium (In, L $\alpha$ 1): Magenta signal showing the distribution of indium within the  $\text{In}_2\text{O}_3$  layer. Oxygen (O, K $\alpha$ 1): Green signal indicating the distribution of oxygen, particularly in the oxide layers ( $\text{Al}_2\text{O}_3$  and  $\text{In}_2\text{O}_3$ ).

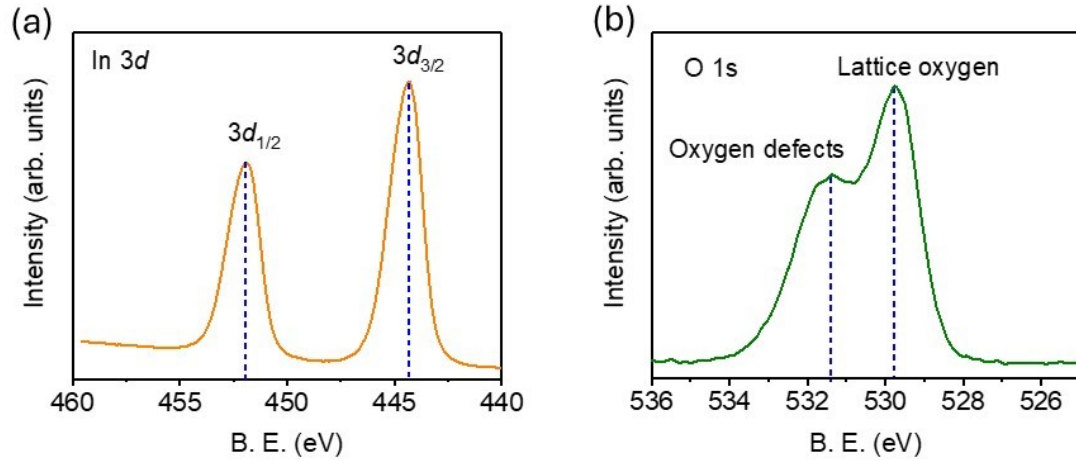

**Fig. S2.** X-ray photoelectron spectroscopy (XPS) spectra of the  $\text{In}_2\text{O}_3$  thin film showing the binding energy (B.E.) and corresponding peaks for indium (In) and oxygen (O). (a) XPS spectrum of indium (In 3d) displaying two distinct peaks. The peaks correspond to the spin-orbit split components of indium: In  $3d_{5/2}$  at a binding energy of approximately 444.5 eV and In  $3d_{3/2}$  at approximately 451.0 eV. The blue dashed lines indicate the positions of these peaks. (b) XPS spectrum of oxygen (O 1s) showing the presence of two main features. The peak at approximately 530.5 eV corresponds to lattice oxygen in the  $\text{In}_2\text{O}_3$  structure, while the shoulder at around 532.0 eV is attributed to oxygen defects or hydroxyl groups. The blue dashed lines mark the positions of these features.

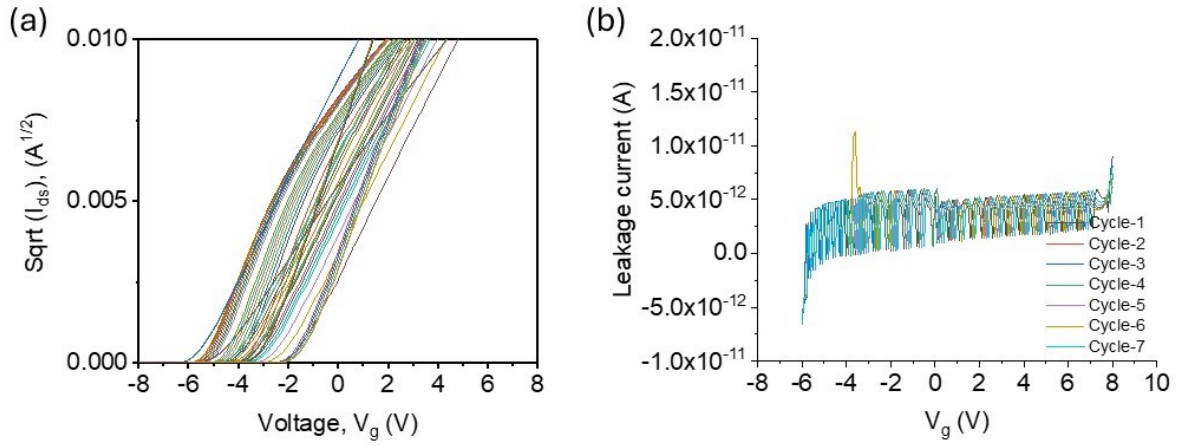

**Fig. S3.** Electrical characterization of the  $\text{In}_2\text{O}_3$  thin film transistor (TFT) over multiple cycles, showing transfer characteristics and leakage current behavior. (a) Plot of the square root of the drain current ( $I_{ds}$ ) versus gate voltage ( $V_g$ ). (b) Leakage current ( $I_{leak}$ ) versus gate voltage ( $V_g$ ) for the TFT measured over seven cycles. The graph displays the low leakage current ( $\sim 10^{-12}$  A) behavior, highlighting the stability and reliability of the device under repeated cycling.

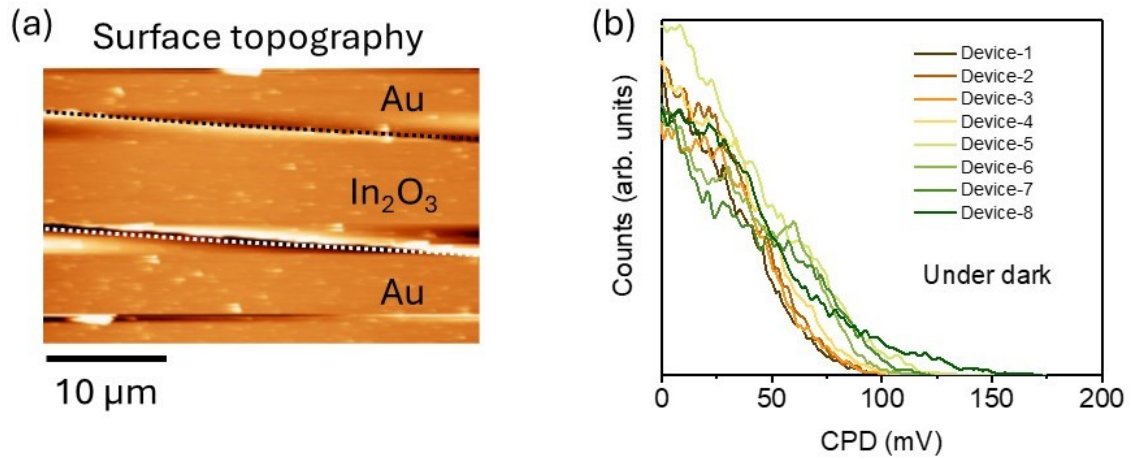

**Fig. S4.** Surface topography and contact potential difference (CPD) measurements of the Au/In<sub>2</sub>O<sub>3</sub>/Au structure under dark conditions. (a) Atomic force microscopy (AFM) image showing the surface topography of the structure comprising gold (Au) and indium oxide (In<sub>2</sub>O<sub>3</sub>). The image highlights the clear distinction between the Au and In<sub>2</sub>O<sub>3</sub> layers, marked by dotted lines. The scale bar represents 10 μm. (b) Contact potential difference ( $V_{\text{cpd}}$ ) measurements for multiple devices (Device-1 to Device-8) under dark conditions. Each curve corresponds to a different device, demonstrating the variation in  $V_{\text{cpd}}$  among the devices. The consistent shape and overlap of the curves suggest similar surface properties and electronic behavior across the devices.

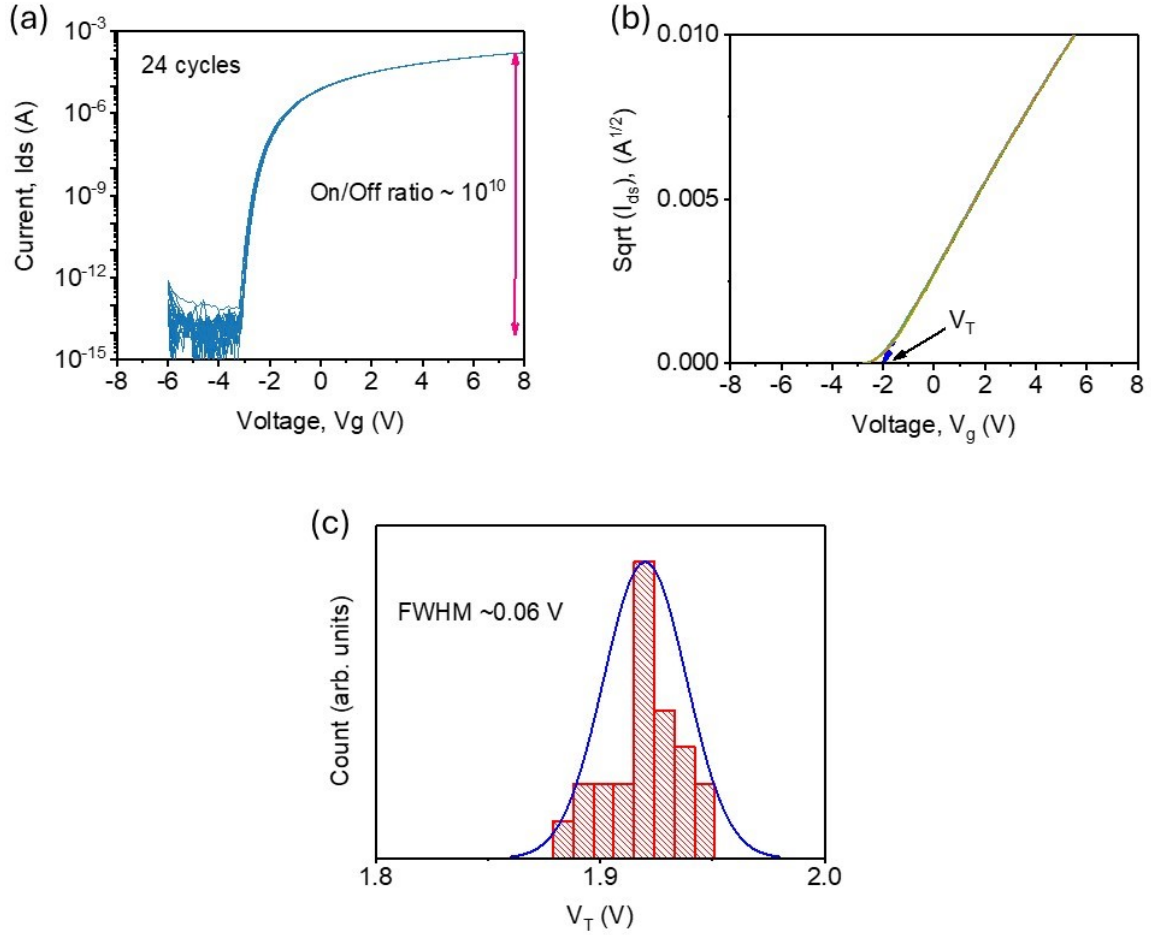

**Fig. S5.** Electrical performance and threshold voltage ( $V_T$ ) distribution of the  $\text{In}_2\text{O}_3$  thin film transistor (TFT) over multiple cycles. (a) Transfer characteristic of the  $\text{In}_2\text{O}_3$  TFT measured over 24 cycles. The graph shows the drain current ( $I_{ds}$ ) as a function of gate voltage ( $V_g$ ), with a demonstrated on/off current ratio of approximately  $10^{10}$ . The high on/off ratio and the consistency over multiple cycles underscore the device's robust switching performance. (b) Plot of the square root of the drain current ( $I_{ds}$ ) versus gate voltage ( $V_g$ ). The linear region of the plot is used to extract the  $V_T$ , indicated by the arrow. (c) Histogram of the  $V_T$  distribution for the  $\text{In}_2\text{O}_3$  TFT. The histogram is based on measurements from multiple cycles, showing a mean  $V_T$  around 1.9 V with a full width at half maximum (FWHM) of approximately 0.06 V.

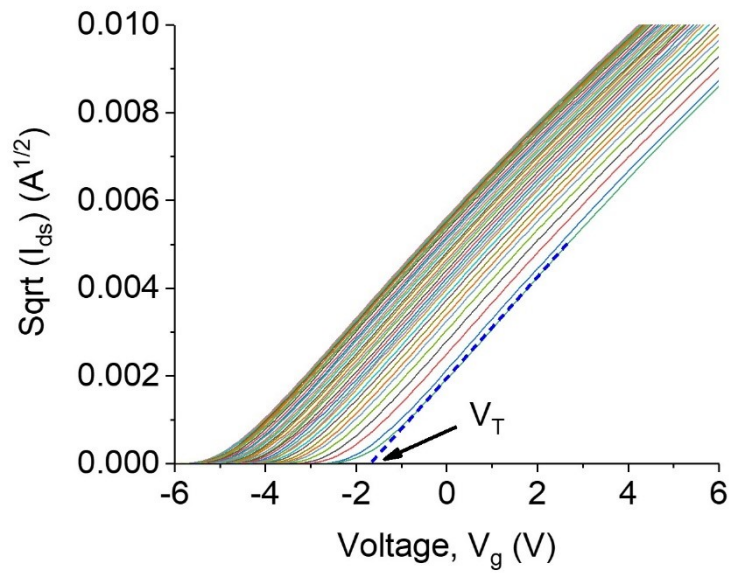

**Fig. S6.** Threshold voltage ( $V_T$ ) extraction from transfer characteristics of  $\text{In}_2\text{O}_3$  thin film transistors (TFTs). The plot shows the square root of the drain current ( $I_{ds}$ ) versus gate voltage ( $V_g$ ) with illumination time.

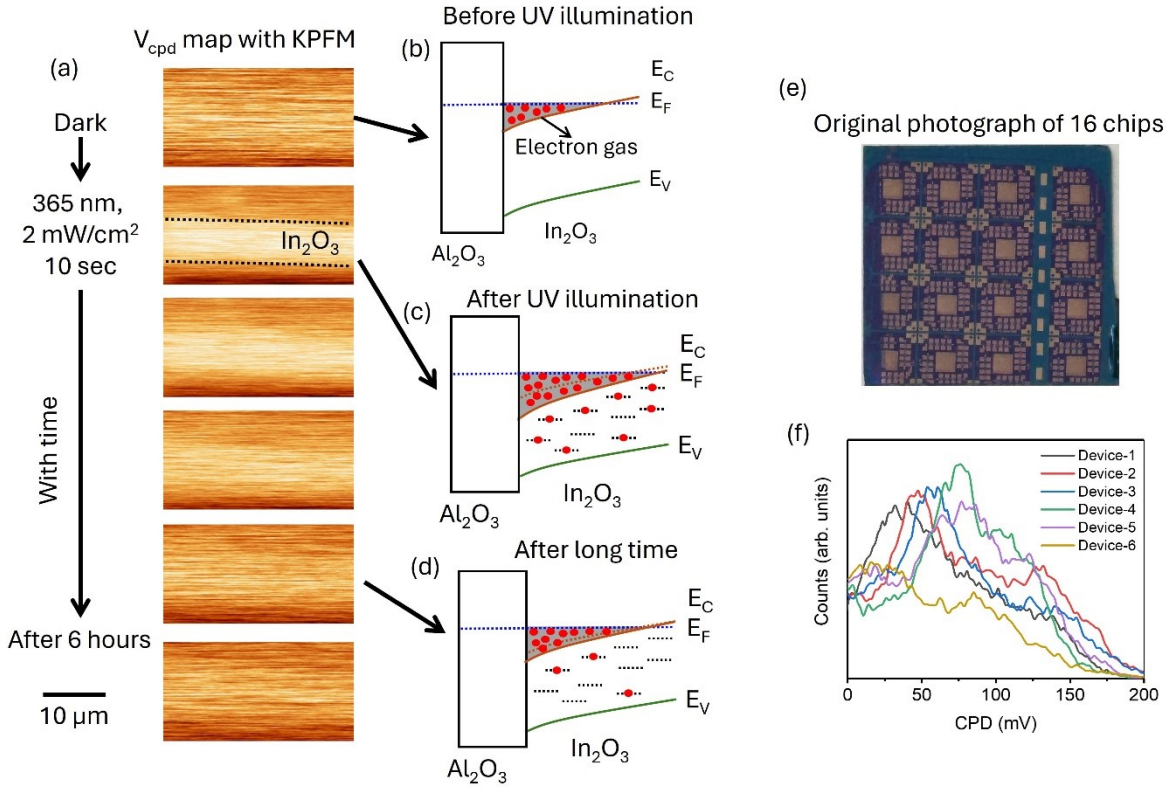

**Fig. S7.** Schematic diagram illustrating the working mechanism of the neuromorphic optical sensor and the role of persistent photoconductivity, charge trapping, and detrapping in dynamic memory and UV signal classification. (a) Contact potential difference ( $V_{\text{cpd}}$ ) map acquired through Kelvin Probe Force Microscopy (KPFM) under different conditions: initially in the dark, then under UV illumination (365 nm, 2 mW/cm<sup>2</sup>, 10 seconds), and over time up to 6 hours post-illumination. This  $V_{\text{cpd}}$  map demonstrates the gradual recovery of surface potential after UV exposure, indicating persistent photoconductivity and the effects of charge trapping and detrapping. Scale bar = 10  $\mu\text{m}$ . (b) Energy band diagram before UV illumination, showing the  $\text{Al}_2\text{O}_3/\text{In}_2\text{O}_3$  interface with a two-dimensional electron gas (2DEG) near the conduction band ( $E_C$ ) level in the  $\text{In}_2\text{O}_3$  layer. (c) Energy band diagram immediately after UV illumination, depicting the increased electron density in the 2DEG region due to UV-induced charge trapping near the interface, which shifts the Fermi level ( $E_F$ ) upward and enhances conductivity. (d) Energy band diagram showing the gradual detrapping of charges over time, as electrons slowly escape from traps, leading to a gradual decrease in the electron density in the 2DEG and a reduction in photocurrent. This slow detrapping process underpins the dynamic memory effect, allowing for the classification of UV signals based on the persistence and decay of the photocurrent. (e) Photograph of a full-length device containing 16  $\text{In}_2\text{O}_3$  chips used for the experiments. This image shows the arrangement and layout of the devices on the chip. (f)  $V_{\text{cpd}}$  measurements for multiple devices (Device-1 to Device-6) after illuminating with UV (365 nm, 2 mW-cm<sup>-2</sup>, 10 seconds), indicating the variation in surface potential among the devices. The measurements demonstrate the distribution of CPD values, which is crucial for understanding the electronic properties of the devices.



$V_T$  variation of total 56 device devices

|      |      |      |      |      |                  |
|------|------|------|------|------|------------------|
| 3.17 | 5.34 | 4.57 | 3.68 | 3.33 | Selected devices |
| 3.02 | 5.21 | 3.97 | 4.2  | 4.22 |                  |
| 3.08 | 4.96 | 5.15 | 3.41 | 5.25 |                  |
| 2.92 | 5.56 | 5.26 | 4.34 | 4.26 |                  |
| 2.67 | 6.04 | 3.39 | 3.66 | 3.46 |                  |
| 1.6  | 3.21 | 5.23 | 5.19 | 5.29 |                  |
| 1.68 | 3.25 | 5.17 | 1.99 | 3.72 |                  |
| 1.7  | 3.39 | 3.83 | 3.6  | 5.92 |                  |
| 1.93 | 3.15 | 4.1  | 4.1  | 5.46 |                  |
| 1.86 | 3.29 | 5.58 | 3.66 | 4.26 |                  |
| 2.28 | 4.65 | 5.38 | 4.59 |      |                  |

**Fig. S8.** Variation of threshold voltage ( $V_T$ ) across 56  $\text{In}_2\text{O}_3$  thin film transistor devices. The table displays the  $V_T$  values in volts for each device, with selected devices highlighted by a red outline.

| Dark condition |      |      |      |      | 10 sec |      |      |      |      | 60 sec |      |      |      |      | 180 sec |      |      |      |      |      |
|----------------|------|------|------|------|--------|------|------|------|------|--------|------|------|------|------|---------|------|------|------|------|------|
| 3.17           | 5.34 | 4.57 | 3.68 | 3.33 | 310 nm | 3.20 | 5.48 | 4.80 | 3.80 | 3.39   | 3.52 | 6.00 | 5.33 | 4.27 | 3.66    | 4.19 | 7.10 | 6.26 | 5.01 | 4.53 |
| 3.02           | 5.21 | 3.97 | 4.2  | 4.22 |        | 3.17 | 5.38 | 4.08 | 4.43 | 4.46   | 3.58 | 5.99 | 4.54 | 5.00 | 5.01    | 4.17 | 7.06 | 5.32 | 5.84 | 5.90 |
| 3.08           | 4.96 | 5.15 | 3.41 | 5.25 |        | 3.16 | 5.05 | 5.26 | 3.60 | 5.45   | 3.49 | 5.45 | 5.76 | 4.09 | 6.04    | 4.11 | 6.40 | 6.78 | 4.71 | 7.04 |
| 2.92           | 5.56 | 5.26 | 4.34 | 4.26 |        | 3.06 | 5.67 | 5.57 | 4.54 | 4.43   | 3.42 | 6.13 | 6.31 | 5.07 | 4.95    | 4.01 | 7.23 | 7.36 | 5.81 | 5.58 |
| 2.67           | 6.04 | 3.39 | 3.66 | 3.46 |        | 2.81 | 6.31 | 3.48 | 3.79 | 3.61   | 3.18 | 7.12 | 3.83 | 4.21 | 4.10    | 3.70 | 8.24 | 4.49 | 4.94 | 4.72 |
|                |      |      |      |      | 365 nm | 3.20 | 5.41 | 4.74 | 3.76 | 3.36   | 3.36 | 5.69 | 5.03 | 4.05 | 3.62    | 3.80 | 6.50 | 5.80 | 4.61 | 4.24 |
|                |      |      |      |      |        | 3.12 | 5.34 | 4.04 | 4.35 | 4.38   | 3.35 | 5.68 | 4.31 | 4.69 | 4.70    | 3.90 | 6.46 | 4.91 | 5.44 | 5.48 |
|                |      |      |      |      |        | 3.12 | 5.06 | 5.21 | 3.54 | 5.38   | 3.30 | 5.24 | 5.52 | 3.81 | 5.73    | 3.73 | 5.88 | 6.17 | 4.42 | 6.47 |
|                |      |      |      |      |        | 3.02 | 5.62 | 5.46 | 4.47 | 4.37   | 3.24 | 5.89 | 5.88 | 4.78 | 4.70    | 3.74 | 6.63 | 6.84 | 5.41 | 5.06 |
|                |      |      |      |      |        | 2.77 | 6.26 | 3.45 | 3.76 | 3.57   | 2.99 | 6.71 | 3.66 | 4.00 | 3.86    | 3.44 | 7.57 | 4.14 | 4.59 | 4.35 |
|                |      |      |      |      | 395 nm | 3.18 | 5.38 | 4.64 | 3.72 | 3.35   | 3.26 | 5.51 | 4.78 | 3.84 | 3.47    | 3.44 | 5.80 | 5.10 | 4.06 | 3.71 |
|                |      |      |      |      |        | 3.06 | 5.28 | 4.01 | 4.27 | 4.30   | 3.18 | 5.44 | 4.13 | 4.43 | 4.45    | 3.37 | 5.73 | 4.33 | 4.69 | 4.73 |
|                |      |      |      |      |        | 3.10 | 5.01 | 5.20 | 3.46 | 5.31   | 3.21 | 5.11 | 5.32 | 3.61 | 5.48    | 3.36 | 5.36 | 5.57 | 3.82 | 5.75 |
|                |      |      |      |      |        | 2.97 | 5.56 | 5.35 | 4.40 | 4.32   | 3.06 | 5.73 | 5.56 | 4.54 | 4.48    | 3.25 | 6.07 | 5.90 | 4.78 | 4.60 |
|                |      |      |      |      |        | 2.70 | 6.16 | 3.42 | 3.70 | 3.50   | 2.83 | 6.37 | 3.51 | 3.82 | 3.66    | 3.00 | 6.65 | 3.70 | 4.05 | 3.82 |

**Fig. S9.** Threshold voltage ( $V_T$ ) variation in  $\text{In}_2\text{O}_3$  thin film transistors under different UV exposure conditions. The tables show the  $V_T$  values in volts for devices measured in dark conditions and after exposure to UV light at wavelengths of 310 nm, 365 nm, and 395 nm for durations of 10 seconds, 60 seconds, and 180 seconds. The data highlights the impact of UV exposure on the  $V_T$  values across multiple devices, demonstrating the dependency on wavelength and exposure time. This data corresponds to the matrix in Figure 2j in main text.

| Dark condition |      |      |      |      |
|----------------|------|------|------|------|
| 3.17           | 5.34 | 4.57 | 3.68 | 3.33 |
| 3.02           | 5.21 | 3.97 | 4.2  | 4.22 |
| 3.08           | 4.96 | 5.15 | 3.41 | 5.25 |
| 2.92           | 5.56 | 5.26 | 4.34 | 4.26 |
| 2.67           | 6.04 | 3.39 | 3.66 | 3.46 |

  

|        |               | 10 sec |      |      |      |      | 60 sec |      |      |      |      | 180 sec |      |      |      |      |
|--------|---------------|--------|------|------|------|------|--------|------|------|------|------|---------|------|------|------|------|
|        |               |        |      |      |      |      |        |      |      |      |      |         |      |      |      |      |
| 310 nm | After 60 mins | 3.18   | 5.44 | 4.76 | 3.77 | 3.36 | 3.48   | 5.91 | 5.24 | 4.19 | 3.61 | 4.14    | 6.95 | 6.14 | 4.90 | 4.45 |
|        |               | 3.15   | 5.34 | 4.05 | 4.39 | 4.43 | 3.51   | 5.91 | 4.47 | 4.92 | 4.93 | 4.12    | 6.93 | 5.24 | 5.76 | 5.78 |
|        |               | 3.13   | 5.01 | 5.23 | 3.58 | 5.42 | 3.42   | 5.39 | 5.67 | 4.02 | 5.93 | 4.03    | 6.31 | 6.69 | 4.63 | 6.92 |
|        |               | 3.03   | 5.63 | 5.54 | 4.50 | 4.39 | 3.36   | 6.03 | 6.20 | 5.00 | 4.86 | 3.95    | 7.12 | 7.26 | 5.72 | 5.46 |
|        |               | 2.79   | 6.26 | 3.45 | 3.76 | 3.58 | 3.12   | 7.03 | 3.75 | 4.15 | 4.05 | 3.64    | 8.08 | 4.40 | 4.83 | 4.65 |
| 365 nm | After 60 mins | 3.18   | 5.37 | 4.72 | 3.73 | 3.33 | 3.31   | 5.58 | 4.96 | 3.97 | 3.56 | 3.75    | 6.38 | 5.67 | 4.51 | 4.17 |
|        |               | 3.10   | 5.30 | 4.01 | 4.31 | 4.35 | 3.29   | 5.61 | 4.22 | 4.60 | 4.61 | 3.82    | 6.36 | 4.83 | 5.35 | 5.38 |
|        |               | 3.09   | 5.01 | 5.18 | 3.52 | 5.35 | 3.24   | 5.15 | 5.45 | 3.76 | 5.62 | 3.68    | 5.79 | 6.09 | 4.34 | 6.34 |
|        |               | 3.00   | 5.59 | 5.44 | 4.43 | 4.33 | 3.19   | 5.77 | 5.78 | 4.72 | 4.63 | 3.68    | 6.55 | 6.73 | 5.31 | 5.00 |
|        |               | 2.75   | 6.22 | 3.42 | 3.74 | 3.54 | 2.93   | 6.56 | 3.59 | 3.92 | 3.81 | 3.39    | 7.46 | 4.07 | 4.50 | 4.30 |
| 395 nm | After 60 mins | 3.16   | 5.34 | 4.62 | 3.68 | 3.33 | 3.21   | 5.39 | 4.72 | 3.79 | 3.42 | 3.40    | 5.73 | 5.04 | 4.00 | 3.64 |
|        |               | 3.04   | 5.24 | 3.99 | 4.24 | 4.28 | 3.12   | 5.34 | 4.06 | 4.35 | 4.38 | 3.32    | 5.63 | 4.25 | 4.62 | 4.65 |
|        |               | 3.08   | 4.97 | 5.17 | 3.44 | 5.28 | 3.16   | 5.00 | 5.25 | 3.53 | 5.38 | 3.30    | 5.24 | 5.45 | 3.74 | 5.64 |
|        |               | 2.95   | 5.52 | 5.32 | 4.36 | 4.30 | 3.01   | 5.62 | 5.46 | 4.46 | 4.43 | 3.19    | 5.97 | 5.82 | 4.70 | 4.56 |
|        |               | 2.68   | 6.11 | 3.39 | 3.68 | 3.47 | 2.78   | 6.27 | 3.46 | 3.77 | 3.60 | 2.94    | 6.54 | 3.65 | 4.00 | 3.74 |

**Fig. S10.** Threshold voltage ( $V_T$ ) variation in  $\text{In}_2\text{O}_3$  thin film transistors under dark conditions and after UV exposure followed by a 60-minute recovery period. The tables display the  $V_T$  values in volts for devices measured in dark conditions and after exposure to UV light at wavelengths of 310 nm, 365 nm, and 395 nm for 10 seconds, 60 seconds, and 180 seconds. The second set of tables shows the  $V_T$  values after a 60-minute recovery period post-exposure. This data illustrates the impact of UV exposure and subsequent recovery on the  $V_T$  values across multiple devices, demonstrating the effects of different wavelengths and exposure durations.

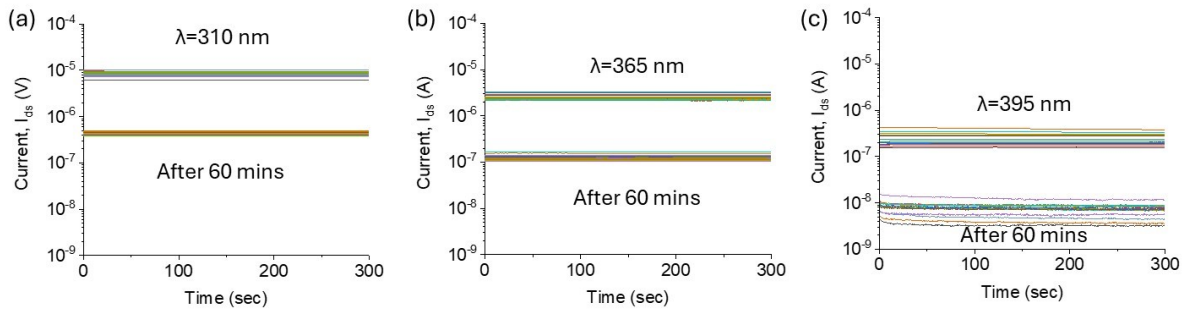

**Fig. S11.** Drain current ( $I_{ds}$ ) variation in  $\text{In}_2\text{O}_3$  thin film transistors under continuous UV exposure and after a 60-minute recovery period. (a) under UV exposure at 310 nm for 300 seconds and the current measured after a 60-minute recovery period. (b)  $I_{ds}$  versus time under UV exposure at 365 nm for 300 seconds and the current measured after a 60-minute recovery period. (c)  $I_{ds}$  versus time under UV exposure at 395 nm for 300 seconds and the current measured after a 60-minute recovery period.

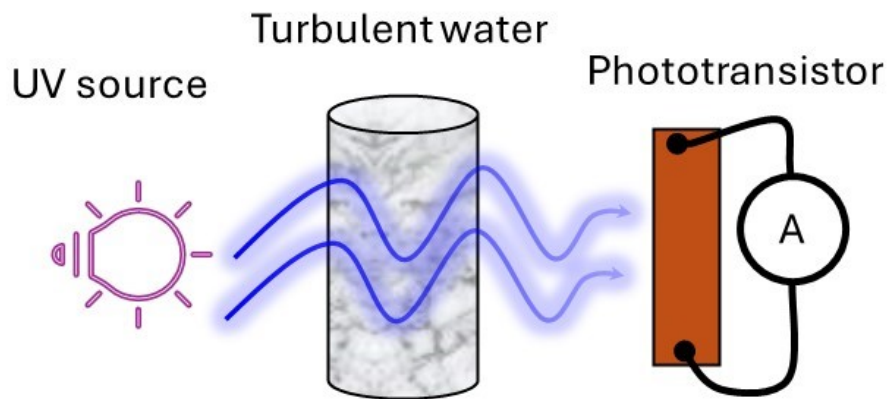

**Fig. S12.** Schematic diagram of the experimental setup used to measure the effect of UV light on a phototransistor through turbulent water. The setup includes a UV light source, turbulent water as the medium, and a phototransistor connected to source meter for current measurement. The UV light passes through the turbulent water, which may scatter and attenuate the light before it reaches the phototransistor. This configuration is used to study the impact of water-induced turbulence on the performance of the phototransistor under UV illumination.
